# Supplementary material for: Small, stable and biocompatible gold nanoparticles capped with a β-cyclodextrin polymer
Source: Royal Society of Chemistry journal article supplement (doi:10.1039/c5ra19974c), 2015-01-01
Supplement: c5ra19974c1.pdf [file c5ra19974c1.pdf]

## Electronic Supplementary Information

“Small, stable and biocompatible gold nanoparticles capped with a  $\beta$ -cyclodextrin polymer”

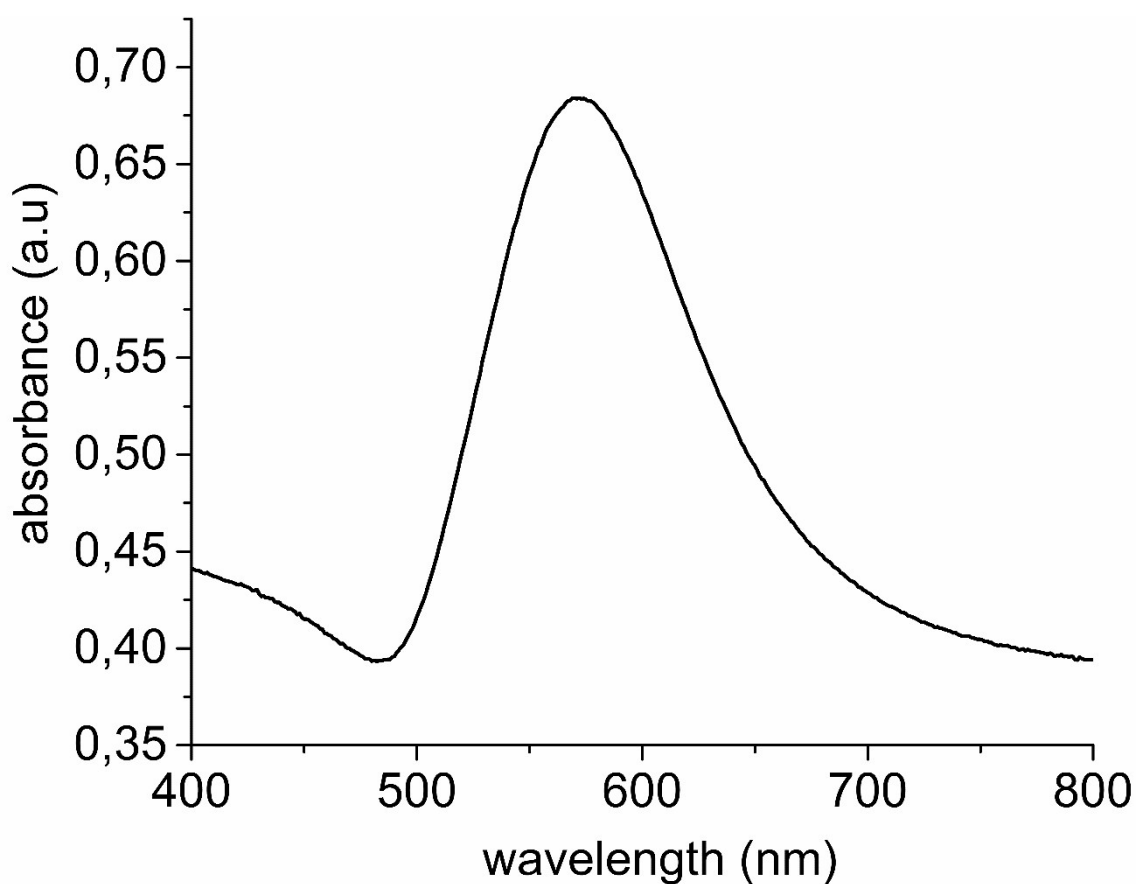

Fig. S1. UV-Vis. spectrum recorded to AuNPs prepared at  $[\beta\text{CDP}] = 10 \text{ mg/mL}$  in absence of  $\text{Na}_3\text{Cit}$

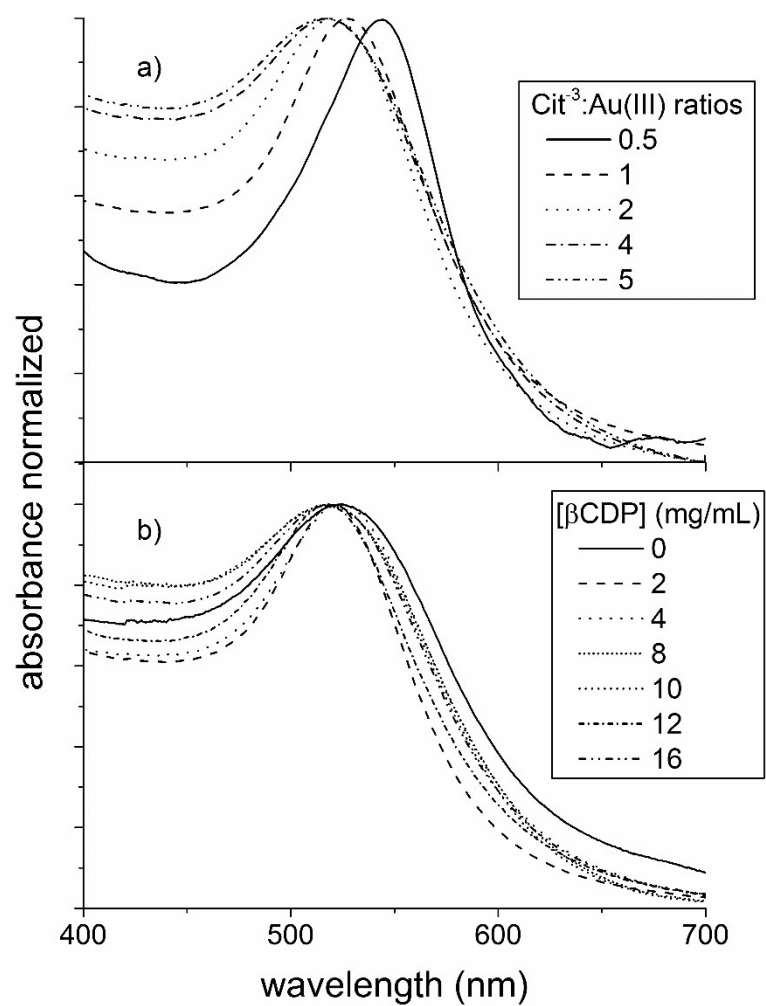

Fig. S2. UV-Vis. spectrum recorded to AuNPs prepared at different Cit<sup>3-</sup>:Au(III) ratios (a) and at different mass concentration of βCDP (b).

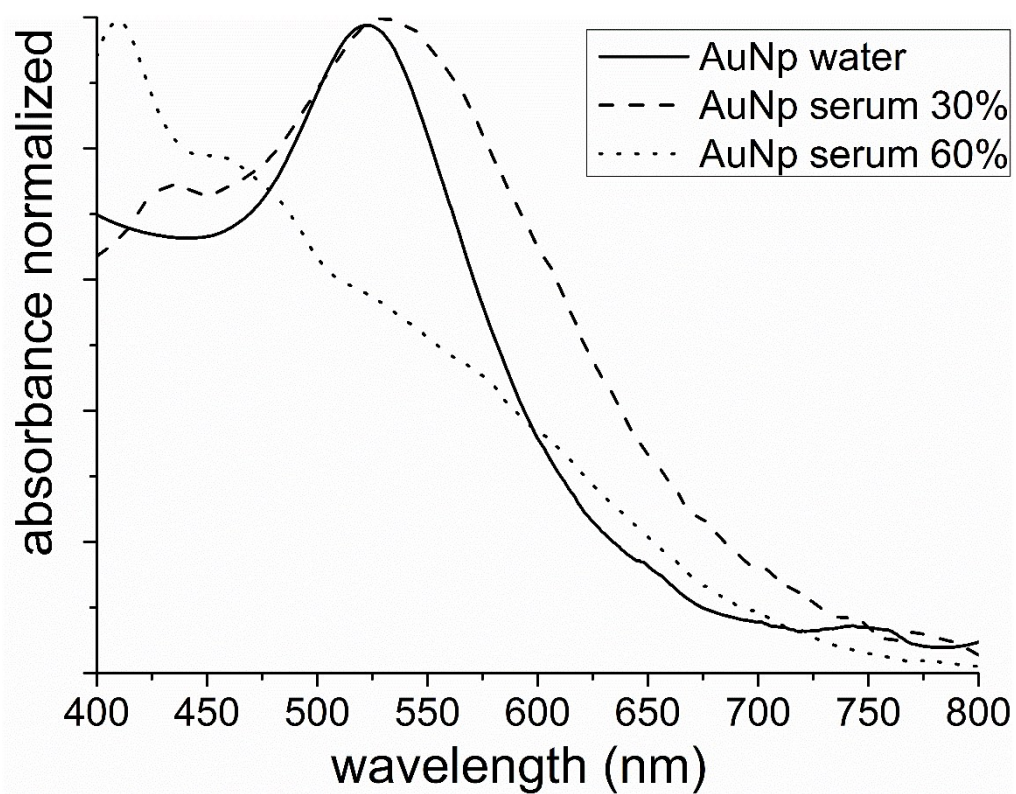

Fig. S3. UV-Vis. spectrum of AuNPs prepared in absence of  $\beta$ CDP after two days in water (solid line) and in 30% (dashed line) and 60% (dotted line) v/v of blood serum/water.

Table S1:  $\zeta$ -potentials values determined by DLS

| System            | pH  | $\zeta$ -potential (s.d)* |
|-------------------|-----|---------------------------|
| AuNP@Cit          | 5.7 | -39.6 ( $\pm 1.8$ )       |
| AuNP@ $\beta$ CDP | 6.3 | -19.3 ( $\pm 1.5$ )       |

\*Standard deviation determined by five independently measurements each with a least 12 runs.
